# Supplementary material
Source: PubMed Central journal article supplement (PMC5819881)

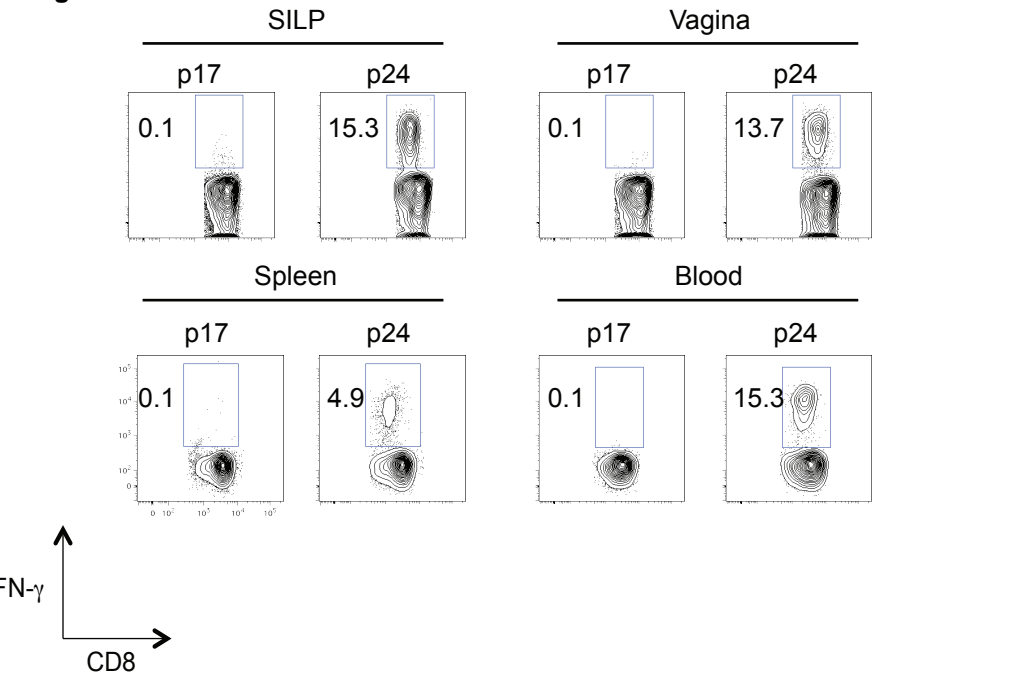

B

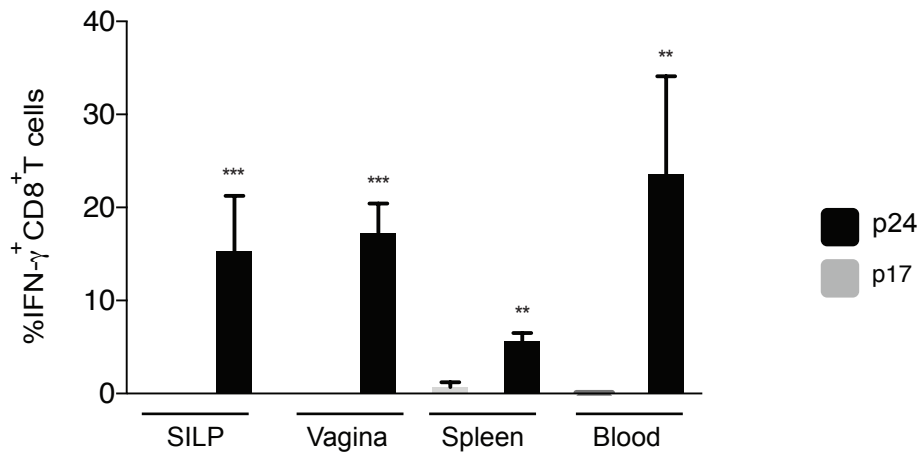

Supplement: NIHMS741494-supplement-supplement_1.pdf [file NIHMS741494-supplement-supplement_1.pdf]
